# Supplementary material
Source: PubMed Central journal article supplement (PMC6420050)
Supplement: NIHMS82167-supplement-Supporting_Information.pdf [file NIHMS82167-supplement-Supporting_Information.pdf]

1 **Title: Nitrogen addition does not reduce the role of spatial asynchrony in stabilizing**  
2 **grassland communities**

3

4 Yunhai Zhang,<sup>1,2</sup>† Jinchao Feng,<sup>3</sup>† Michel Loreau,<sup>4</sup> Nianpeng He,<sup>5</sup> Xingguo Han<sup>2\*</sup>, Lin Jiang<sup>1\*</sup>

5 <sup>1</sup>School of Biological Sciences, Georgia Institute of Technology, Atlanta, Georgia 30332, USA

6 <sup>2</sup>State Key Laboratory of Vegetation and Environmental Change, Institute of Botany, Chinese

7 Academy of Sciences, Beijing 100093, China

8 <sup>3</sup>Institute of Desertification Studies, Chinese Academy of Forestry, Beijing 100091, China

9 <sup>4</sup>Centre for Biodiversity Theory and Modelling, Theoretical and Experimental Ecology Station,

10 CNRS and Paul Sabatier University, Moulis 09200, France

11 <sup>5</sup>Synthesis Research Center of Chinese Ecosystem Research Network, Institute of Geographic

12 Sciences and Natural Resources Research, Chinese Academy of Sciences, Beijing 100101, China

13 †The authors contributed equally to this work.

14 \*Correspondence: E-mail: X.H. (xghan@ibcas.ac.cn) or L.J. (lin.jiang@biology.gatech.edu).

15 Tel.: +1 404-385-2514, Fax: +1 404-894-0519

16

17 **Supporting Information**

18 **Figure S1. Effects of N addition on unweighted and biomass-weighted stability.** The  
19 unweighted and biomass-weighted (a) alpha and (b) population stabilities were significantly  
20 reduced by N addition. The opened star symbol indicates data from the control. Black and gray  
21 symbols correspond to unweighted and biomass-weighted stability, respectively.

22

23 **Figure S2. The initial structural equation model for N enrichment effects on gamma**  
24 **stability.** All plausible pathways were considered, on the basis of theoretical and empirical  
25 predications.

26

27 **Figure S3. Effects of N addition on beta dissimilarity at the 10-m<sup>2</sup> scale.** Neither (a) the  
28 presence/absence-based index (Jaccard dissimilarity,  $\beta_J$ ) nor (b) the abundance-based index  
29 (Bray-Curtis dissimilarity,  $\beta_{BC}$ ) was altered by N addition. The open star symbol indicates data  
30 from the control.

31

32 **Figure S4. Results of non-metric multidimensional scaling (NMDS) of plant communities**  
33 **across the N addition gradient.** NMDS was performed based on Bray-Curtis dissimilarity  
34 ( $\beta_{BC}$ ). Panel a-e correspond to year 2009-2013, respectively. All stresses < 0.2. Colors correspond  
35 to the rate of N addition ( $\text{g N m}^{-2} \text{ year}^{-1}$ ).

36

37 **Figure S5. Effects of N enrichment on beta diversity and spatial asynchrony at the 5-m<sup>2</sup>**  
38 **scale.** (a) N addition significantly reduced additive beta diversity ( $\beta_a$ ), but not (b) multiplicative  
39 beta diversity ( $\beta_m$ ), (c)  $\beta_J$ , (d)  $\beta_{BC}$ , or (e) beta variability (i.e., spatial asynchrony among 5 1-m<sup>2</sup>  
40 local communities). The open star symbol indicates data from the control.

41 **Fig. S1**

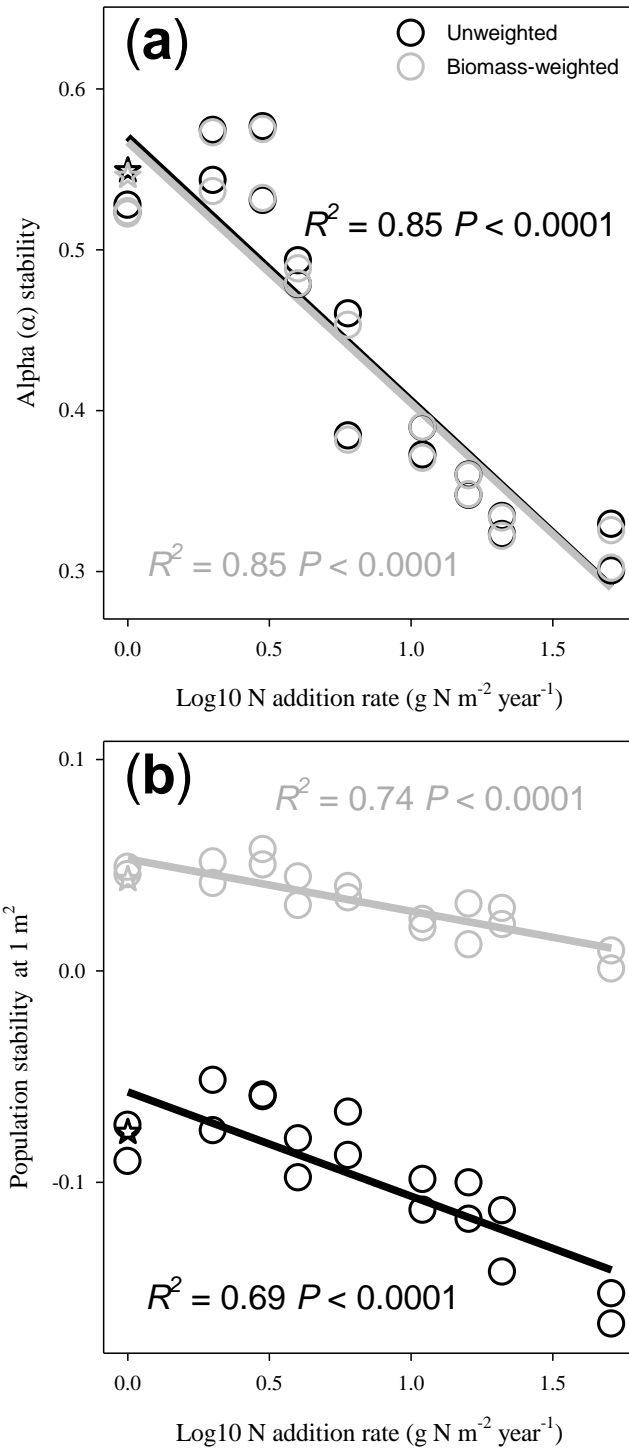

42

43

44 Fig. S2

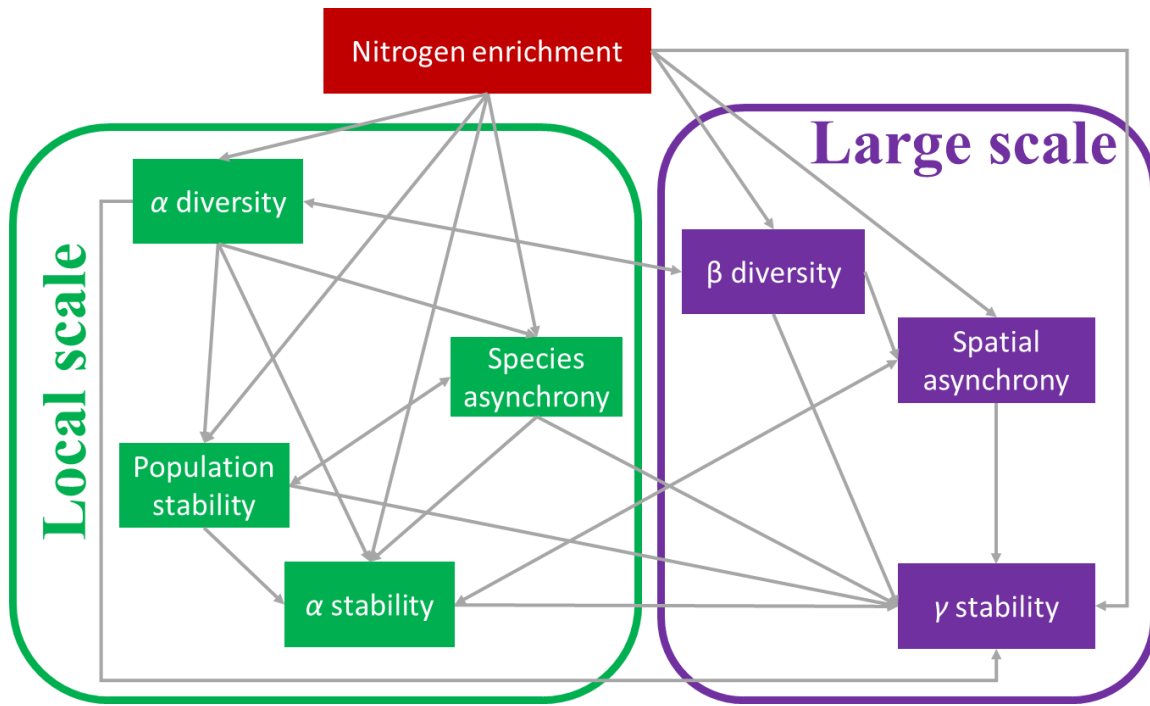

45

46

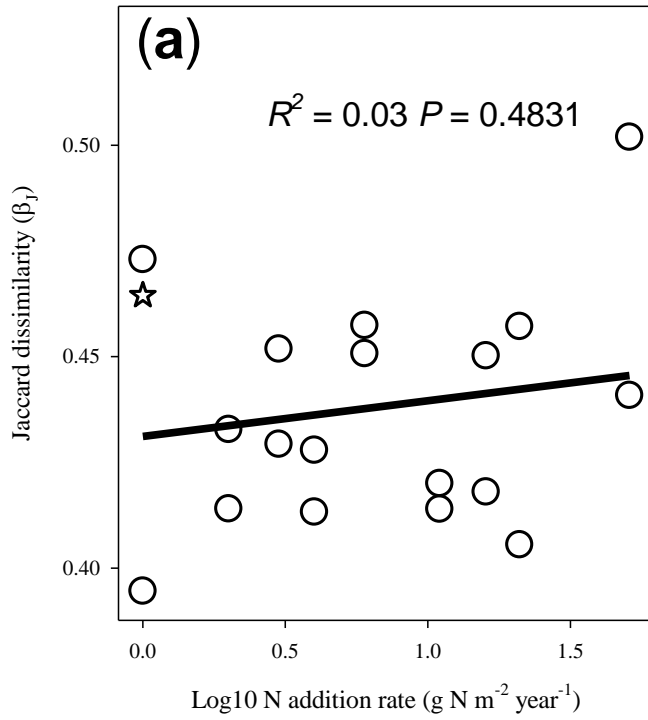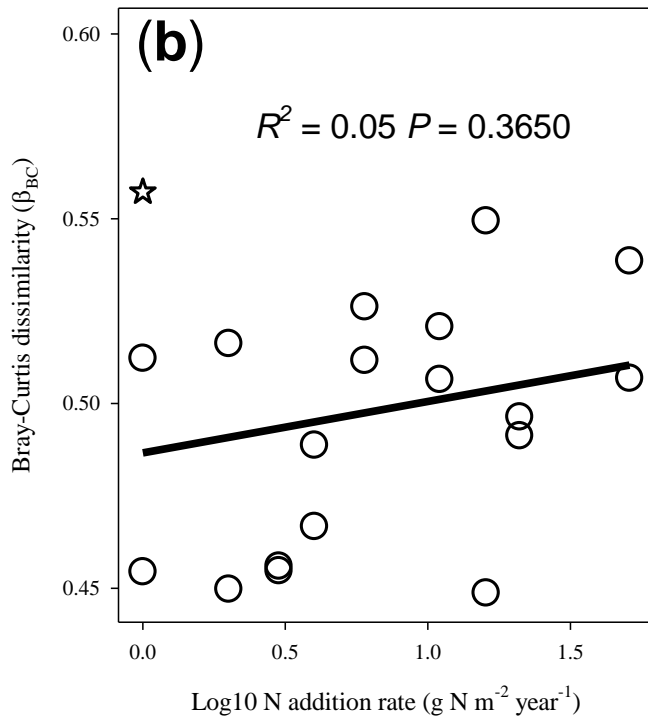

50 **Fig. S4**

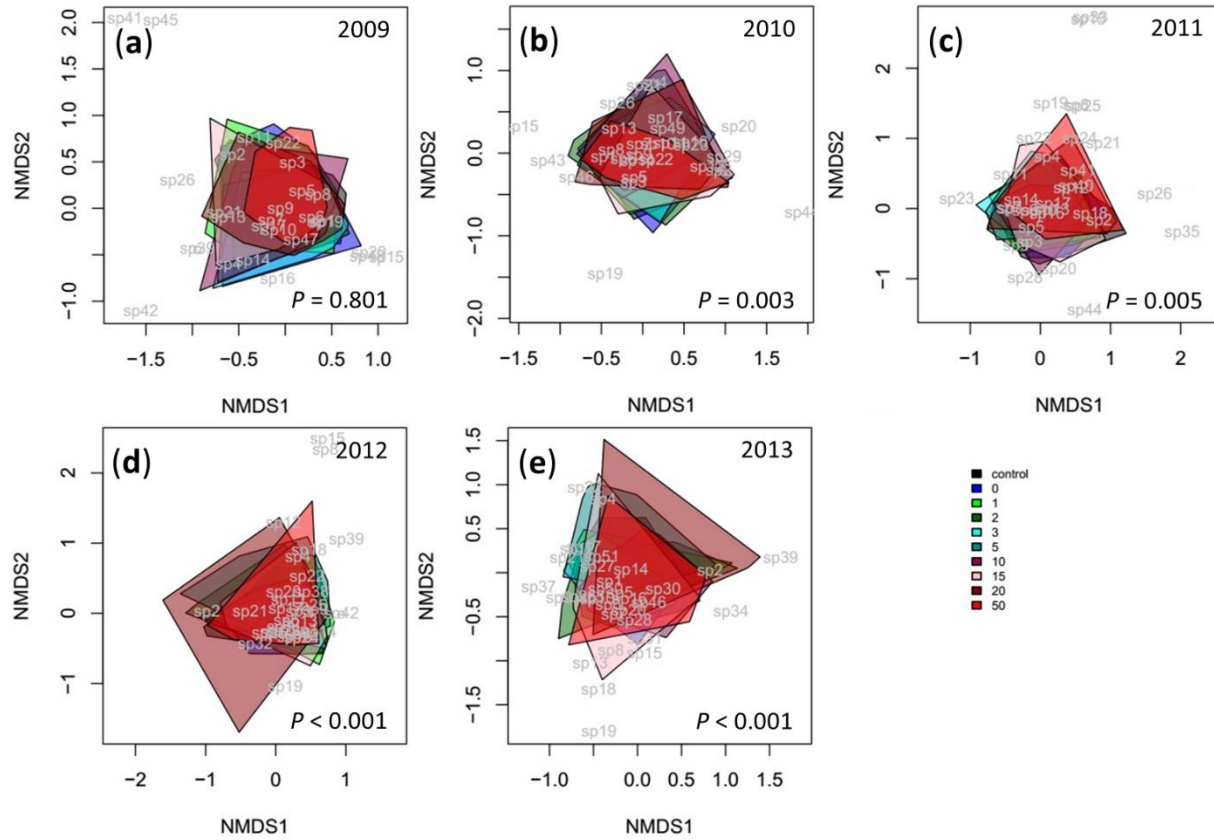

51

52

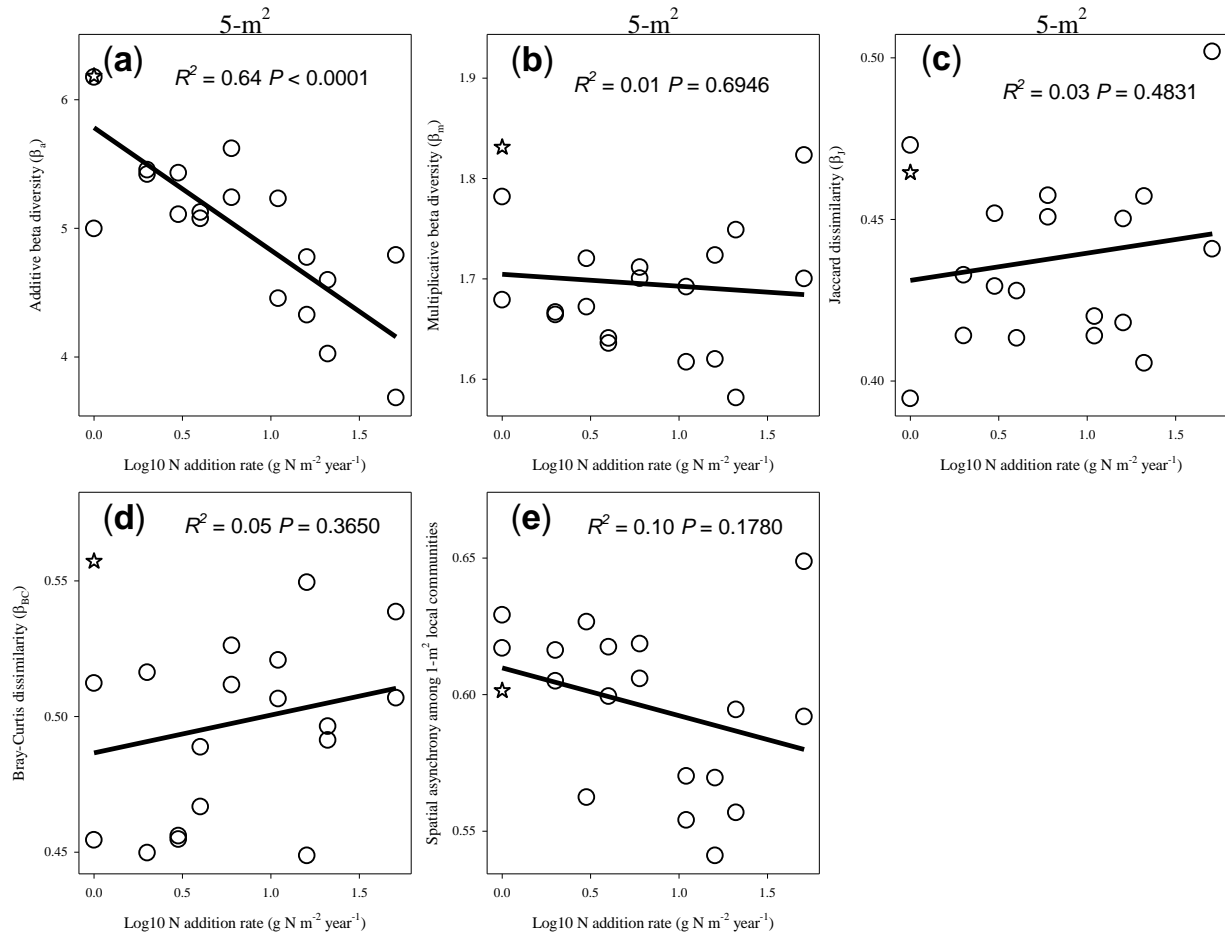

**Table S1.** The relative ANPP (ranked according to species ANPP in no N plots) and statistics of the regression between N addition rate and spatial asynchrony for each species. The listed species together accounted for at least 99% community ANPP in each treatment.

| N addition rate (g N m <sup>-2</sup> year <sup>-1</sup> ) | Relative ANPP (%) |                          |      |      |      |      |      |      |      |      |      |         |      |      |      |      |      |      |      |          | Relationship between N rate and spatial asynchrony |                 |  |  |
|-----------------------------------------------------------|-------------------|--------------------------|------|------|------|------|------|------|------|------|------|---------|------|------|------|------|------|------|------|----------|----------------------------------------------------|-----------------|--|--|
|                                                           | Control           | 0                        | 1    | 2    | 3    | 5    | 10   | 15   | 20   | 50   | 0    | 1       | 2    | 3    | 5    | 10   | 15   | 20   | 50   | <i>r</i> | <i>F</i> -value                                    | <i>P</i> -value |  |  |
| N addition frequency                                      | Control           | Twice year <sup>-1</sup> |      |      |      |      |      |      |      |      |      | Monthly |      |      |      |      |      |      |      |          |                                                    |                 |  |  |
| <i>Stipa grandis</i>                                      | 33.8              | 38.0                     | 39.8 | 47.8 | 37.9 | 34.7 | 37.1 | 32.3 | 36.8 | 27.7 | 32.4 | 38.9    | 50.4 | 40.1 | 36.0 | 36.4 | 45.6 | 34.7 | 35.3 | -0.44    | 4.2                                                | 0.0567          |  |  |
| <i>Leymus chinensis</i>                                   | 25.0              | 21.7                     | 20.7 | 15.2 | 27.3 | 24.8 | 19.5 | 30.6 | 14.1 | 41.2 | 28.6 | 15.3    | 14.0 | 20.5 | 15.5 | 17.9 | 22.5 | 16.8 | 29.7 | -0.78    | 26.9                                               | <0.001          |  |  |
| <i>Achnatherum sibiricum</i>                              | 16.5              | 12.0                     | 15.0 | 11.8 | 13.1 | 13.5 | 16.5 | 14.9 | 13.7 | 12.0 | 20.1 | 18.0    | 13.3 | 10.8 | 13.0 | 17.4 | 7.7  | 9.7  | 9.9  | -0.21    | 0.8                                                | 0.3821          |  |  |
| <i>Agropyron cristatum</i>                                | 10.0              | 19.7                     | 9.3  | 13.6 | 11.2 | 15.5 | 17.4 | 11.3 | 27.7 | 12.4 | 6.8  | 14.4    | 11.5 | 16.3 | 19.2 | 13.8 | 13.5 | 31.3 | 17.7 | -0.18    | 0.6                                                | 0.4643          |  |  |
| <i>Carex korshinskyi</i>                                  | 4.7               | 3.8                      | 6.6  | 4.8  | 4.4  | 5.9  | 3.8  | 3.9  | 2.3  | 2.3  | 5.0  | 5.5     | 4.6  | 5.4  | 5.1  | 5.7  | 3.6  | 2.3  | 2.3  | -0.45    | 4.3                                                | 0.0546          |  |  |
| <i>Cleistogenes squarrosa</i>                             | 3.9               | 2.6                      | 3.6  | 3.1  | 3.1  | 1.5  | 1.6  | 1.8  | 1.5  | 1.3  | 3.3  | 3.1     | 2.7  | 2.7  | 2.1  | 2.9  | 2.3  | 1.6  | 0.8  | -0.74    | 20.4                                               | 0.0003          |  |  |
| <i>Koeleria cristata</i>                                  | 1.2               | 0.5                      | 1.5  | 0.4  | 0.7  | 0.5  | 0.7  | 1.0  | 0.5  | 0.1  | 1.4  | 1.7     | 1.0  | 1.4  | 0.6  | 0.5  | 0.5  | 0.4  | 0.2  | -0.49    | 5.4                                                | 0.0325          |  |  |
| <i>Festuca dahurica</i>                                   | 2.2               | 0.1                      | 0.2  | 0.1  | 0.1  | 0.1  | 0.0  | 0.4  | 0.0  | 0.0  | 0.2  | 0.2     | 0.1  | 0.3  | 0.0  | 0.0  | 0.0  | 0.0  | 0.2  | -0.48    | 4.8                                                | 0.0435          |  |  |
| <i>Poa subfastigiata</i>                                  | 1.1               | 0.4                      | 0.4  | 0.8  | 0.2  | 0.4  | 0.4  | 0.1  | 0.0  | 0.0  | 0.5  | 0.5     | 0.5  | 0.2  | 0.3  | 0.6  | 1.8  | 0.3  | 0.1  | -0.74    | 20.6                                               | <0.001          |  |  |
| <i>Allium tenuissimum</i>                                 | 0.4               | 0.3                      | 0.4  | 0.5  | 0.4  | 0.4  | 0.3  | 0.1  | 0.1  | 0.1  | 0.6  | 0.3     | 0.2  | 0.4  | 0.3  | 0.1  | 0.3  | 0.2  | 0.1  | -0.32    | 1.9                                                | 0.1862          |  |  |
| <i>Chenopodium glaucum</i>                                | 0.3               | 0.2                      | 0.2  | 0.4  | 0.6  | 1.1  | 1.1  | 2.1  | 2.3  | 2.3  | 0.2  | 0.2     | 0.7  | 0.7  | 1.7  | 2.2  | 1.5  | 1.5  | 1.7  | 0.37     | 2.7                                                | 0.1203          |  |  |
| <i>Saussurea japonica</i>                                 | 0.0               | 0.0                      | 1.1  | 0.0  | 0.0  | 0.0  | 0.3  | 0.0  | 0.0  | 0.1  | 0.1  | 0.0     | 0.0  | 0.0  | 3.5  | 0.0  | 0.0  | 0.0  | 0.0  | 0.01     | 0.0                                                | 0.9866          |  |  |
| <i>Allium anisopodium</i>                                 | 0.2               | 0.0                      | 0.0  | 0.0  | 0.0  | 0.0  | 0.0  | 0.0  | 0.0  | 0.0  | 0.0  | 0.0     | 0.0  | 0.0  | 0.0  | 0.0  | 0.0  | 0.0  | 0.0  | 0.00     | 0.0                                                | 1.0000          |  |  |
| <i>Salsola collina</i>                                    | 0.2               | 0.1                      | 0.5  | 0.0  | 0.1  | 0.6  | 0.2  | 0.1  | 0.1  | 0.0  | 0.1  | 0.2     | 0.1  | 0.0  | 0.3  | 0.3  | 0.2  | 0.4  | 0.2  | -0.32    | 1.9                                                | 0.1881          |  |  |
| <i>Iris tenuifolia</i>                                    | 0.1               | 0.0                      | 0.3  | 0.0  | 0.0  | 0.0  | 0.0  | 0.1  | 0.0  | 0.0  | 0.2  | 0.1     | 0.1  | 0.1  | 0.2  | 0.1  | 0.0  | 0.0  | 0.1  | -0.14    | 0.3                                                | 0.5926          |  |  |
| <i>Thalictrum petaloideum</i>                             | 0.0               | 0.0                      | 0.0  | 0.0  | 0.0  | 0.0  | 0.0  | 0.0  | 0.0  | 0.0  | 0.1  | 0.0     | 0.0  | 0.0  | 0.1  | 0.0  | 0.0  | 0.0  | 0.0  | -0.47    | 2.5                                                | 0.1449          |  |  |
| <i>Allium bidentatum</i>                                  | 0.1               | 0.0                      | 0.1  | 0.0  | 0.1  | 0.1  | 0.0  | 0.1  | 0.0  | 0.0  | 0.1  | 0.0     | 0.0  | 0.0  | 0.0  | 0.0  | 0.0  | 0.0  | 0.0  | -0.62    | 10.4                                               | 0.0050          |  |  |
| <i>Allium ramosum</i>                                     | 0.1               | 0.1                      | 0.2  | 0.1  | 0.1  | 0.2  | 0.0  | 0.1  | 0.0  | 0.1  | 0.0  | 0.1     | 0.2  | 0.1  | 0.1  | 0.1  | 0.0  | 0.0  | 0.1  | 0.17     | 0.5                                                | 0.493           |  |  |
| <i>Artemisia scoparia</i>                                 | 0.1               | 0.1                      | 0.0  | 0.1  | 0.0  | 0.0  | 0.2  | 0.0  | 0.0  | 0.0  | 0.0  | 0.3     | 0.0  | 0.0  | 0.7  | 0.8  | 0.0  | 0.0  | 0.0  | -0.58    | 6.4                                                | 0.0248          |  |  |
| <i>Allium condensatum</i>                                 | 0.0               | 0.0                      | 0.0  | 0.0  | 0.1  | 0.0  | 0.0  | 0.0  | 0.0  | 0.0  | 0.0  | 0.0     | 0.0  | 0.0  | 0.0  | 0.0  | 0.0  | 0.0  | 0.0  | 0.00     | 0.0                                                | 1.0000          |  |  |
| <i>Potentilla bifurca</i>                                 | 0.0               | 0.0                      | 0.0  | 0.7  | 0.0  | 0.0  | 0.0  | 0.0  | 0.0  | 0.1  | 0.0  | 0.1     | 0.0  | 0.2  | 0.0  | 0.0  | 0.0  | 0.1  | 0.3  | -0.24    | 0.7                                                | 0.4137          |  |  |
| <i>Kochia prostrata</i>                                   | 0.0               | 0.1                      | 0.0  | 0.0  | 0.0  | 0.0  | 0.0  | 0.0  | 0.0  | 0.0  | 0.0  | 0.1     | 0.0  | 0.0  | 0.0  | 0.0  | 0.0  | 0.0  | 0.0  | 0.00     | 0.0                                                | 1.0000          |  |  |
| <i>Dontostemon micranthus</i>                             | 0.1               | 0.0                      | 0.0  | 0.0  | 0.0  | 0.0  | 0.0  | 0.0  | 0.0  | 0.0  | 0.0  | 0.0     | 0.0  | 0.0  | 0.0  | 0.0  | 0.0  | 0.1  | 0.0  | -0.13    | 0.2                                                | 0.6292          |  |  |
| <i>Chenopodium aristatum</i>                              | 0.0               | 0.0                      | 0.0  | 0.0  | 0.0  | 0.2  | 0.2  | 0.0  | 0.0  | 0.0  | 0.0  | 0.0     | 0.0  | 0.0  | 0.0  | 0.1  | 0.0  | 0.0  | 0.0  | -0.12    | 0.2                                                | 0.6499          |  |  |
| <i>Galium verum</i>                                       | 0.0               | 0.0                      | 0.0  | 0.0  | 0.0  | 0.0  | 0.0  | 0.0  | 0.0  | 0.0  | 0.0  | 0.6     | 0.0  | 0.0  | 0.0  | 0.0  | 0.0  | 0.0  | 0.0  | 0.00     | 0.0                                                | 1.0000          |  |  |
| Summed relative ANPP (%)                                  | 99.7              | 99.9                     | 99.9 | 99.5 | 99.6 | 99.5 | 99.3 | 98.7 | 99.2 | 99.8 | 99.9 | 99.9    | 99.6 | 99.5 | 98.8 | 99.0 | 99.5 | 99.3 | 98.5 |          |                                                    |                 |  |  |
